# Supplementary material
Source: Springer Nature journal article supplement (https://www.springermedizin.de/resource/supplementary/12904_2013_190_MOESM2_ESM.docx/9517858)
Supplement: MOESM2 [file 9517858]

Figure 6. Proportion of patients with adverse effects to corticosteroids recorded


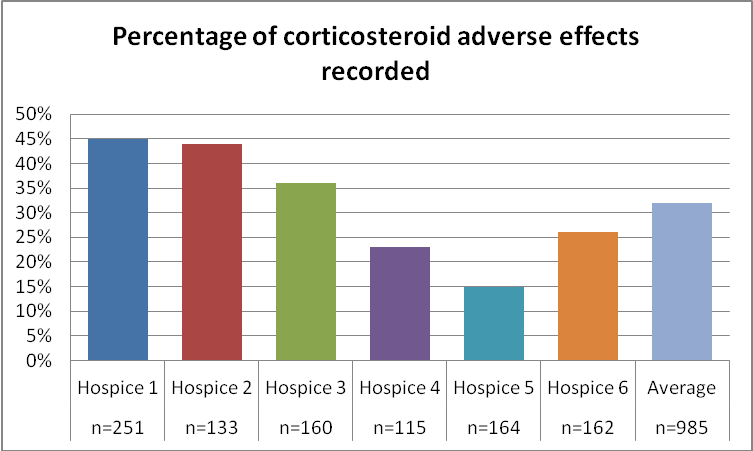


*n*=number of adverse effects events recorded
